# Supplementary material
Source: HighWire-hosted journal article supplement (https://www.cmajopen.ca/highwire/filestream/87301/field_highwire_adjunct_files/2/2021-0013-3-at.pdf)

## Themes

## Subthemes and codes

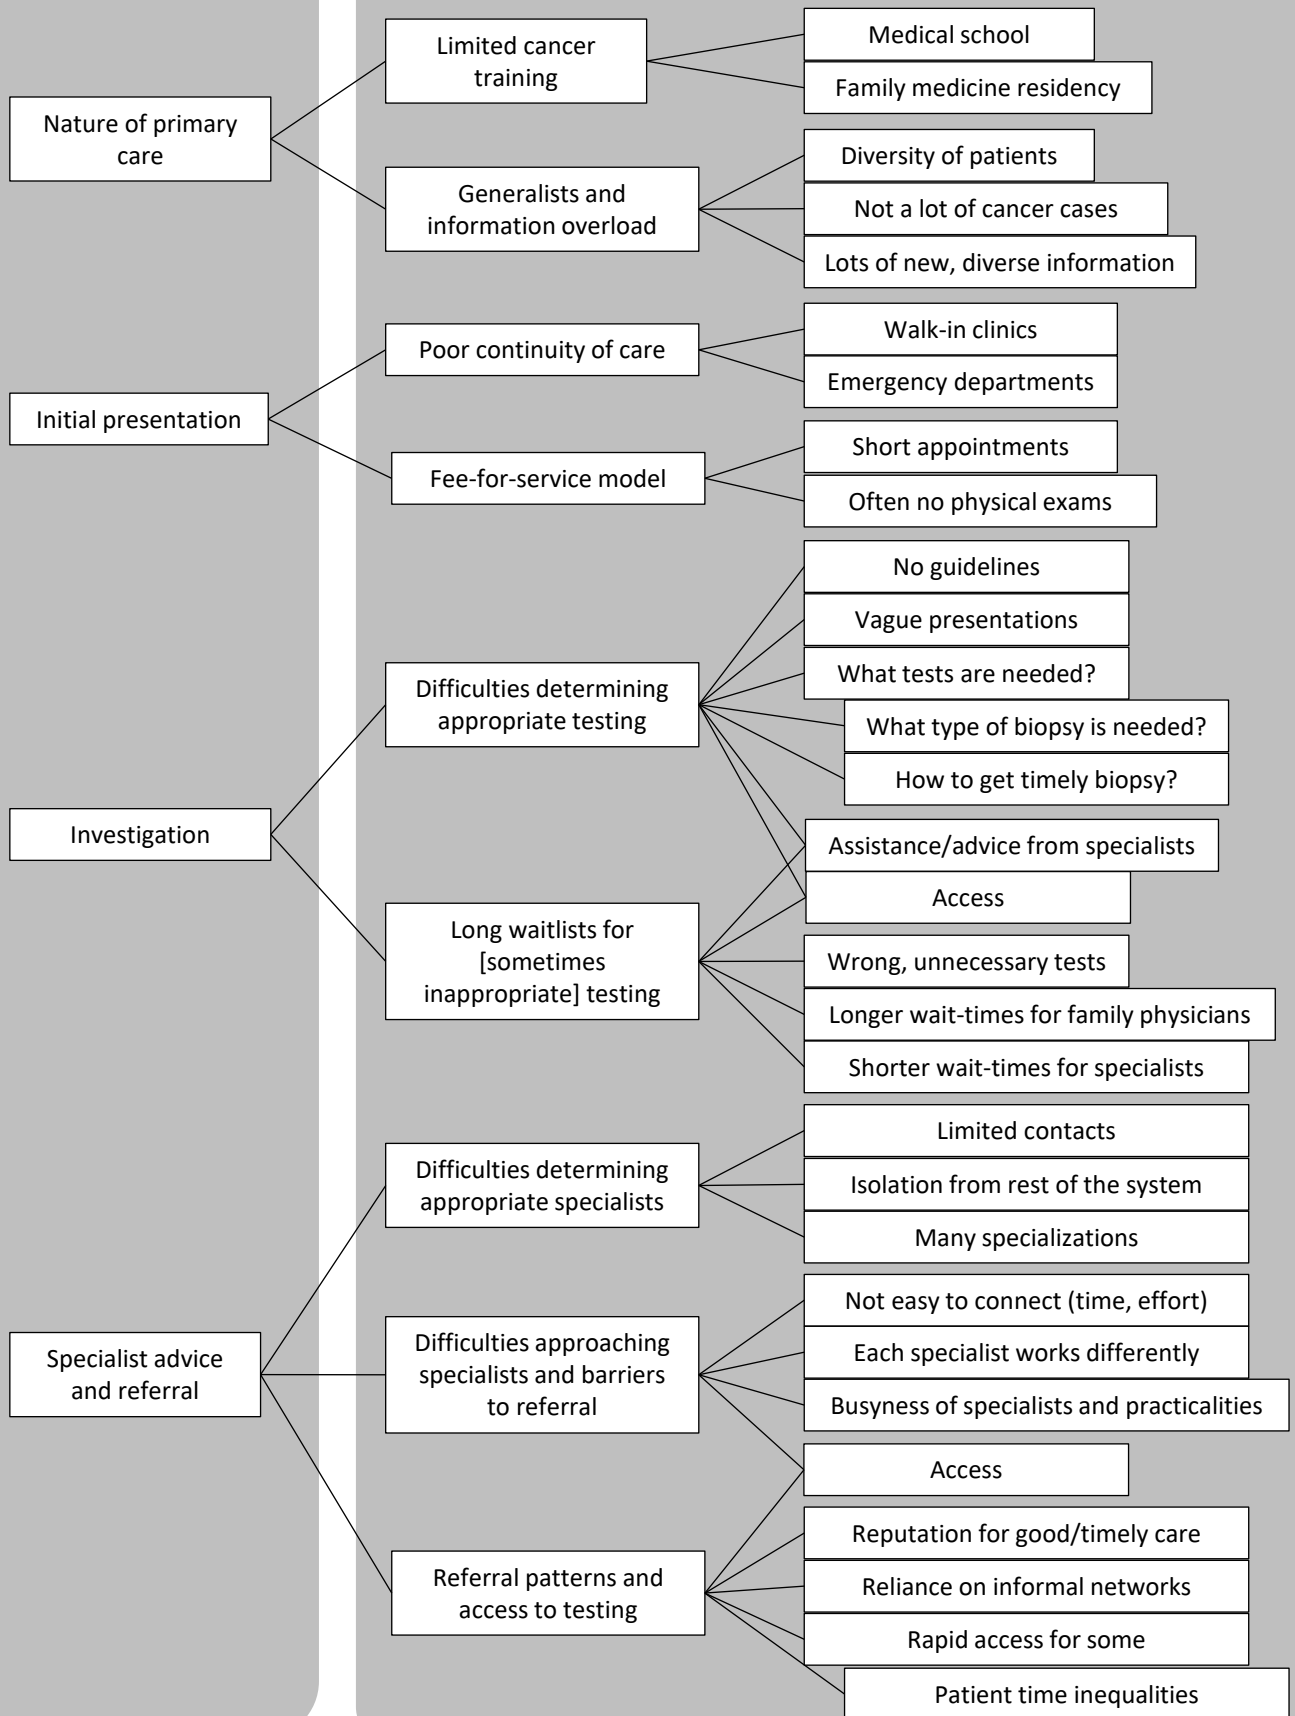

Supplement: 2021-0013-3-at.pdf [file 2021-0013-3-at.pdf]
